# Supplementary material for: Guidelines for Treatment of Hyperemesis Gravidarum and Implementation in Clinical Practice in Norway: A Descriptive Study
Source: Hindawi journal article supplement (doi:10.1155/2024/8830099), 2024-03-27
Supplement: f1 [file 8830099.f1.docx]

**Supplementary Table 1** Use of department protocols or NGF guideline for treatment of hyperemesis gravidarum among included departments by health region

| **Health region** | **Relative size of the health regiona (%)** | **Gynecology departments** | **Local protocols** | **NGF-guideline** |
| --- | --- | --- | --- | --- |
| North | 8 | 10 | 5 | 5 |
| Central | 14 | 7 | 2 | 2 |
| West | 22 | 5 | 4 | 0 |
| South-East | 56 | 17 | 6 | 4 |
| **Total** |  | **39** | **17** | **11** |
| aRelative size of the health regions are calculated based on number of births as percent of the total number of births in Norway in 2018.9 | | | | |
